# Supplementary material for: The miscibility and spatial distribution of the components in electrospun polymer–protein mats
Source: Royal Society of Chemistry journal article supplement (doi:10.1039/c9ra10910b), 2020-01-01
Supplement: c9ra10910b1.pdf [file c9ra10910b1.pdf]

## The miscibility and spatial distribution of the components in electrospun polymer-protein mats

E.R. Pavlova, I.I. Nikishin, A. S. Bogdanova, D.V. Klinov, D.V. Bagrov

### Supplementary information

Table SII. Morphological features of different types of electrospun mats made of PLA, BSA and PLA-BSA blends

Although the morphologies that we observed in this study were obtained under particular experimental conditions (solution feed rate, acceleration voltage, the distance between the tip and the collector, needle parameters etc), the tendencies described in section “Morphology of single-component and blended electrospun mats” do not depend on a particular experimental setup.

| Type of mats | Beads                                                                                        | Cylindrical fibers                            | Ribbons        |
|--------------|----------------------------------------------------------------------------------------------|-----------------------------------------------|----------------|
| 1,5% PLA     | Separate smooth round and elliptical beads ( $0,5 \mu\text{m} \leq d \leq 3,0 \mu\text{m}$ ) | Mean = 120 nm, SD = 40 nm, Median = 120 nm    | None           |
| 3% PLA       | Smooth mostly elliptical beads ( $0,8 \mu\text{m} \leq d \leq 4,5 \mu\text{m}$ )             | Mean = 200 nm, SD = 70 nm, Median = 210 nm    | None           |
| 4,5%PLA      | Elliptical fiber thickening beads ( $1,5 \mu\text{m} \leq d \leq 7,0 \mu\text{m}$ )          | Mean = 510 nm, SD = 240 nm, Median = 540 nm   | None           |
| 6%PLA        | None                                                                                         | Mean = 570 nm, SD = 260 nm, Median = 560 nm   | None           |
| 7% PLA       | None                                                                                         | Mean = 790 nm, SD = 390 nm, Median = 710 nm   | None           |
| 8%PLA        | None                                                                                         | Mean = 820 nm, SD = 430 nm, Median = 800 nm   | None           |
| 9%PLA        | None                                                                                         | Mean = 860 nm, SD = 620 nm, Median = 810 nm   | None           |
| 10%PLA       | None                                                                                         | Mean = 780 nm, SD = 480 nm, Median = 820 nm   | None           |
| 11%PLA       | None                                                                                         | Mean = 1020 nm, SD = 440 nm, Median = 1100 nm | Single ribbons |
| 12%PLA       | None                                                                                         | Mean = 1600 nm, SD = 850 nm, Median = 1720 nm | Single ribbons |
| 1,5%BSA      | Beads with “deflated balls” morphology ( $0,1 \mu\text{m} \leq d \leq 2,5$ )                 | None                                          | None           |

|               |                                                                                                          |                                               |                                                          |
|---------------|----------------------------------------------------------------------------------------------------------|-----------------------------------------------|----------------------------------------------------------|
| 3%BSA         | Beads with “deflated balls” morphology ( $0,1 \mu\text{m} \leq d \leq 4,0$ )                             | None                                          | None                                                     |
| 4,5%BSA       | Beads with “deflated balls” morphology ( $0,1 \mu\text{m} \leq d \leq 10,0$ )                            | Single fine fibers                            | Short ribbons with length no more than $100 \mu\text{m}$ |
| 6%BSA         | Single beads with “deflated balls” morphology                                                            | Single fine fibers                            | Short ribbons with length no more than $100 \mu\text{m}$ |
| 7%BSA         | None                                                                                                     | Single fine fibers                            | Short ribbons with length no more than $500 \mu\text{m}$ |
| 8%BSA         | None                                                                                                     | Single fine fibers                            | Short ribbons with length no more than $600 \mu\text{m}$ |
| 9%BSA         | None                                                                                                     | None                                          | Ribbons + short ribbons                                  |
| 10%BSA        | None                                                                                                     | None                                          | Ribbons + short ribbons                                  |
| 11%BSA        | None                                                                                                     | None                                          | Ribbons + short ribbons                                  |
| 12%BSA        | None                                                                                                     | None                                          | Ribbons + short ribbons                                  |
| 1% (BSA+PLA)  | Single beads with “deflated balls” morphology and fiber thickening ( $0,1 \mu\text{m} \leq d \leq 2,5$ ) | Mean = 30 nm, SD = 10 nm, Median = 30 nm      | None                                                     |
| 2% (BSA+PLA)  | Single beads with “deflated balls” morphology and fiber thickening ( $0,2 \mu\text{m} \leq d \leq 5,5$ ) | Mean = 80 nm, SD = 30 nm, Median = 80 nm      | None                                                     |
| 3% (BSA+PLA)  | Single beads with “deflated balls” morphology and fiber thickening ( $0,2 \mu\text{m} \leq d \leq 6,0$ ) | Mean = 100 nm , SD = 50 nm , Median = 110 nm  | None                                                     |
| 6% (BSA+PLA)  | None                                                                                                     | Mean = 210 nm , SD = 150 nm , Median = 200 nm | Ribbons                                                  |
| 9% (BSA+PLA)  | None                                                                                                     | Mean = 250 nm , SD = 140 nm , Median = 240 nm | Ribbons                                                  |
| 12% (BSA+PLA) | None                                                                                                     | Mean = 270 nm , SD = 200 nm , Median = 250 nm | Ribbons                                                  |

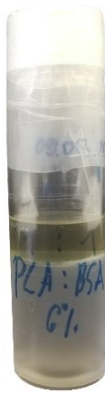

Fig. S11 – The two conjugated solutions obtained from the 6% blend (3% PLA, 3% BSA, 94% HFIP)
